# Supplementary material for: First stable reduced form of [Co5]+10: fine tuning of linear pentacobalt(ii) complexes containing delocalized metal–metal bonds through ligand modification
Source: Royal Society of Chemistry journal article supplement (doi:10.1039/b811520f), 2008-01-01
Supplement: b811520f.pdf [file b811520f.pdf]

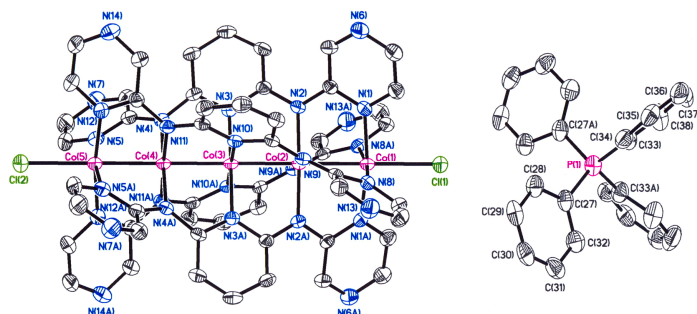

**Fig. S1** The molecular structure of  $(\text{Ph}_4\text{P})[\text{Co}_5(\mu_5\text{-dpzpda})_4\text{Cl}_2]$  (**3**). Atoms are drawn at the 50% probability level. Hydrogen atoms are omitted for clarity. Label A was generated through the symmetry operation  $(-x + 1, y, -z + 3/2)$ .

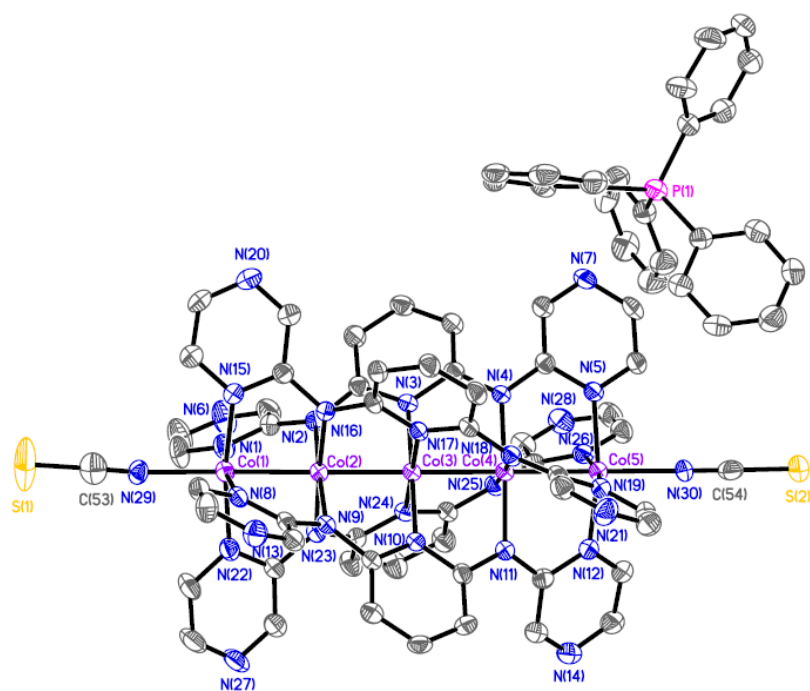

**Fig. S2** The molecular structure of  $(\text{Ph}_4\text{P})[\text{Co}_5(\mu_5\text{-dpzpda})_4(\text{NCS})_2]$  (**4**). Atoms are drawn at the 50% probability level. Hydrogen atoms are omitted for clarity.
